# Supplementary material
Source: PubMed Central journal article supplement (PMC1829234)
Supplement: pnas_0700481104_7.pdf [file pnas_0700481104_7.pdf]

```

          10      20      30      40      50      60
          |      |      |      |      |      |
Prx_6005_Dm -----MSGKALNIGDQFPNFETA
Prdx6_Rn -----MPG-GLLLGDEAPNFEA
Pfl1Cys_Pf -----MAYHLGATFPNFETA
Prx_2540_Dm -----MRLGQTVPNFEA
AtPer1_At -----MPG--ITLGDTPVNLFEV
Prx1_Sc MFSRICAQLKRTAWTLPKQAHLQSQTIKTFATAPILCKQFKQSDQPRLRINSDAPNFDA
Ahpe_Mt -----KVPRGSHMLNVGATAPDFTL

          70      80      90     100     110     120
          |      |      |      |      |      |
Prx_6005_Dm ETS--EGRIDFYDWMQDSWAILFSPADFTPVCTTELSRVAALIPEFQKRGVKPIALS CD
Prdx6_Rn NTT--IGRIRFHDFLGDSWGILFSPADFTPVCTTELGRAAKLAPEFAKRNVKLIALS ID
Pfl1Cys_Pf TASNVDGVLTFYKYVGDNWAILFSPADFTPVCTTELAEFGKMHEEFLKLNCKLIGFSCN
Prx_2540_Dm DTT--KGP LK FHEWQGN S W V L F S H P A D F T P V C T T E L G R I A V H Q P E F A K R N T K L A H S V D
AtPer1_At ETT--HDKFKLHDYFANSWTVLFSHPADFTPVCTTELGAMAKYAHEFDKRGVKLLGLSCD
Prx1_Sc DTT--VGKINFYDYLGDSWGVLFSHPADFTPVCTTEVSAFAKLKPEFDKRNVKLIIGLSVE
Ahpe_Mt RDQN--QQLVTLRGYRGAKNVLVLFPLAFTGICQGEILDQLRDHLP EFENDDSAALATISVG

          130     140     150     160     170     180
          |      |      |      |      |      |
Prx_6005_Dm TVESHKGWIEDIKSFG---KLSSFDPYPIIAD--DKRELALKFNMLDKDEINAE--GIPLT
Prdx6_Rn SVEDHLAWSKDINAYNGETPTEKLPFPIIDD--KGRDLAILLGMMLDPVEKDAN--NMPVT
Pfl1Cys_Pf SKESHQWIEDIKFYG---NLDKWDIPMVCD--ESRELANQLKIMDEKEKDIIK--GLPLT
Prx_2540_Dm ALNSHVDWVNDIKSYCLD-IPGDFPYPIIAD--PTRDLAVTLGMLDEEQKKDP--EVGKT
AtPer1_At DVQSHKDWIKDIEAFN---HGSKVNYPIIAD--PNKEIIPQLNMIDPIE-NG----P---
Prx1_Sc DVESHKWIQDIKEIA---KVKNVGFPIIGD--TFRNVAFLYDMVDAEGFKNINDGSLKT
Ahpe_Mt PPPTHKIW-----AT---QSGFTFPLLSDFWPHGAVSQAYGVFNQAGIAN-----

          190     200     210     220     230     240
          |      |      |      |      |      |
Prx_6005_Dm CRAV F V V D K K K L R L S I L Y P A T T G R N F D E I L R V I D S L Q L T Q -- T K S V A T P A D W K Q G G K C M
Prdx6_Rn ARV V F I F G P D K K L K L S I L Y P A T T G R N F D E I L R V V D S L Q L T G -- T K P V A T P V D W K K G E S V M
Pfl1Cys_Pf C D V F S F I S P D K K F K A T V L Y P A T T G R N S Q E I L R V L K S L Q L T N -- T H P V A T P V N W K E G D K C C
Prx_2540_Dm I R A L F I I S P D H K V R L S M F Y P M S T G R N V D E I L R T I D S L Q L T D R - L K V V A T P A N W T P G T K V M
AtPer1_At S R A L H I V G P D S K I K L S F L Y P S T T G R N M D E V L R A L D S L L M A S K H N N K I A T P V N W K P D Q P V V
Prx1_Sc V R S V F V I D P K K K I R L I F T Y P S T V G R N T S E V L R V I D A L Q L T D -- K E G V V T P I N W Q P A D D V I
Ahpe_Mt - R G T F V V D R S G I I R F A E M K Q P G E V R D Q R L W T D A L A A L T A -----

          250     260     270
          |      |      |
Prx_6005_Dm VLPTVKAEDVPKLFDPDGIETIELPSGKSYLRITPQP
Prdx6_Rn VVPTLSEEEAKQCFPKGVFTKELPSGKKYLRITPQP
Pfl1Cys_Pf I L P S V D N A D L P K L F K N E V K K L M Y H P K R Q S S L -----
Prx_2540_Dm I L P T V T D E E A H K L F P K G F D K V S M P S G V N Y V R T T E N Y
AtPer1_At I S P A V S D E E A K M F P Q G F K T A D L P S K K G Y L R H T E V S
Prx1_Sc I P P S V S N D E A K A K F G ----- Q F N E I K P Y L R F T K S K
Ahpe_Mt -----

```

Figure 10
