# Supplementary material
Source: PubMed Central journal article supplement (PMC1829234)

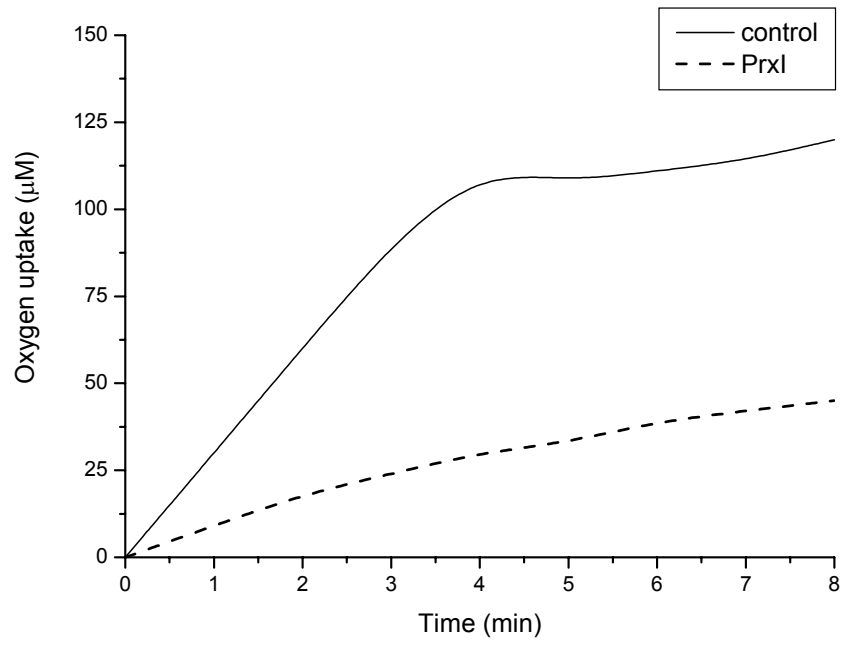

Figure 4

Supplement: pnas_0700481104_1.pdf [file pnas_0700481104_1.pdf]

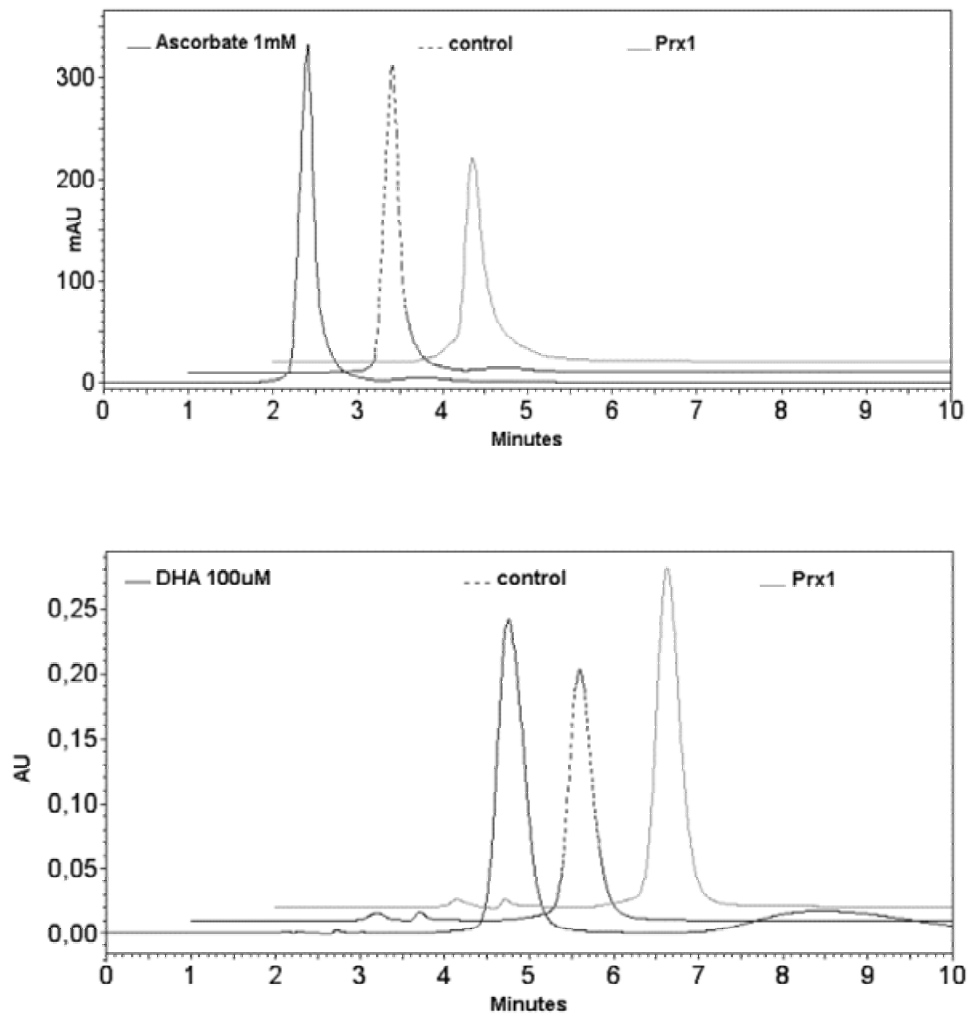

Figure 5

Supplement: pnas_0700481104_2.pdf [file pnas_0700481104_2.pdf]

— control + DTPA

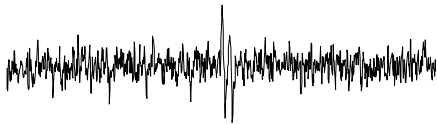

— Prx1 + DTPA

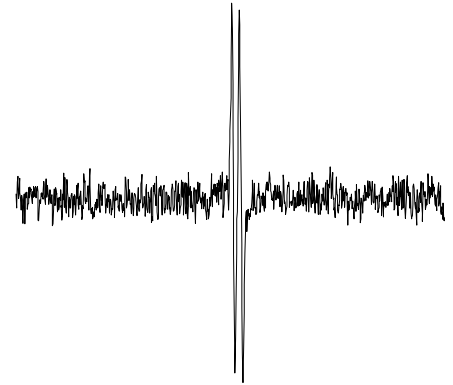

Figure 6

Supplement: pnas_0700481104_3.pdf [file pnas_0700481104_3.pdf]

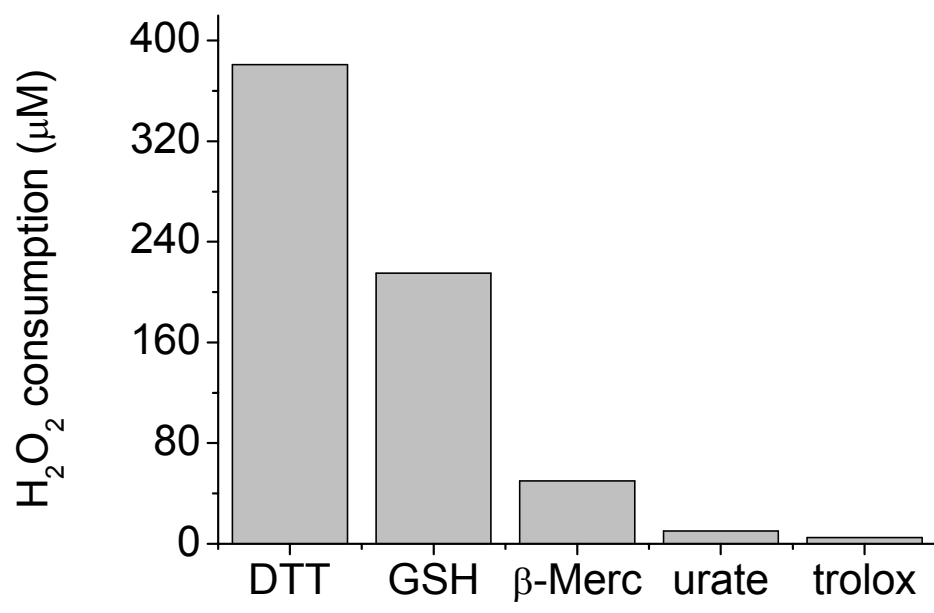

Figure 7

Supplement: pnas_0700481104_4.pdf [file pnas_0700481104_4.pdf]

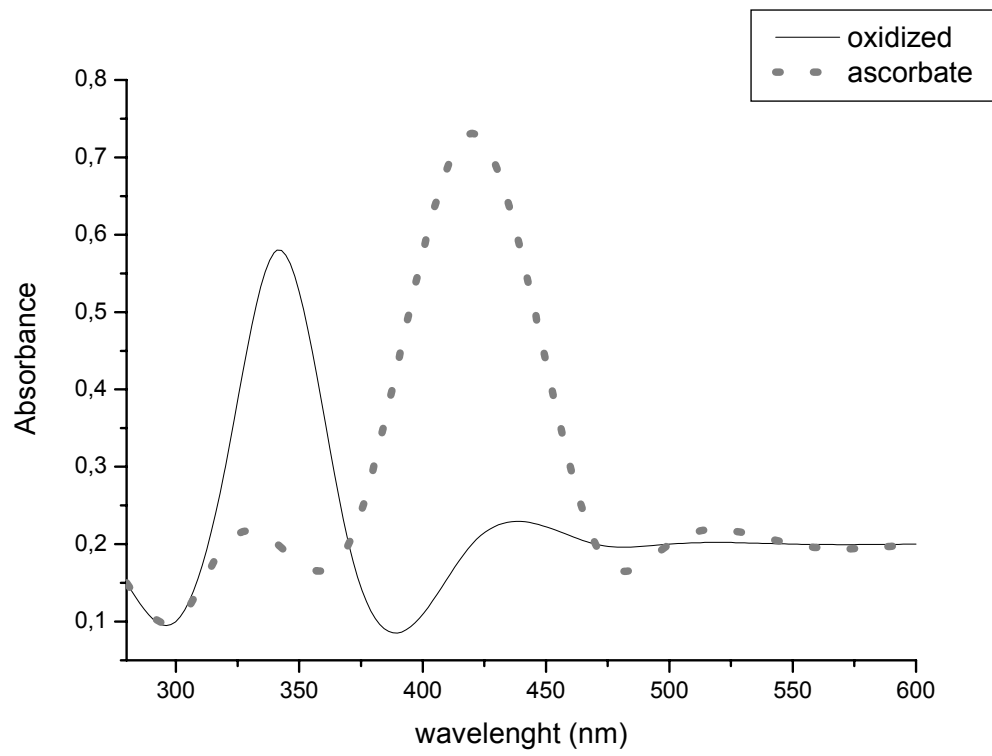

Figure 8

Supplement: pnas_0700481104_5.pdf [file pnas_0700481104_5.pdf]

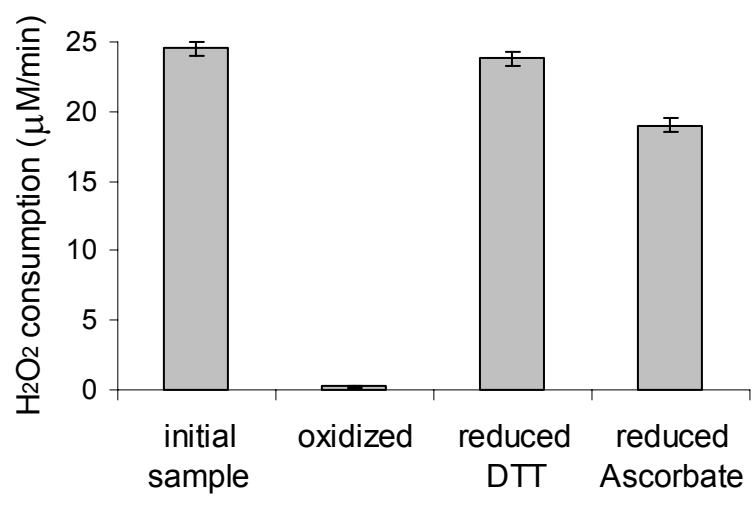

Figure 9

Supplement: pnas_0700481104_6.pdf [file pnas_0700481104_6.pdf]

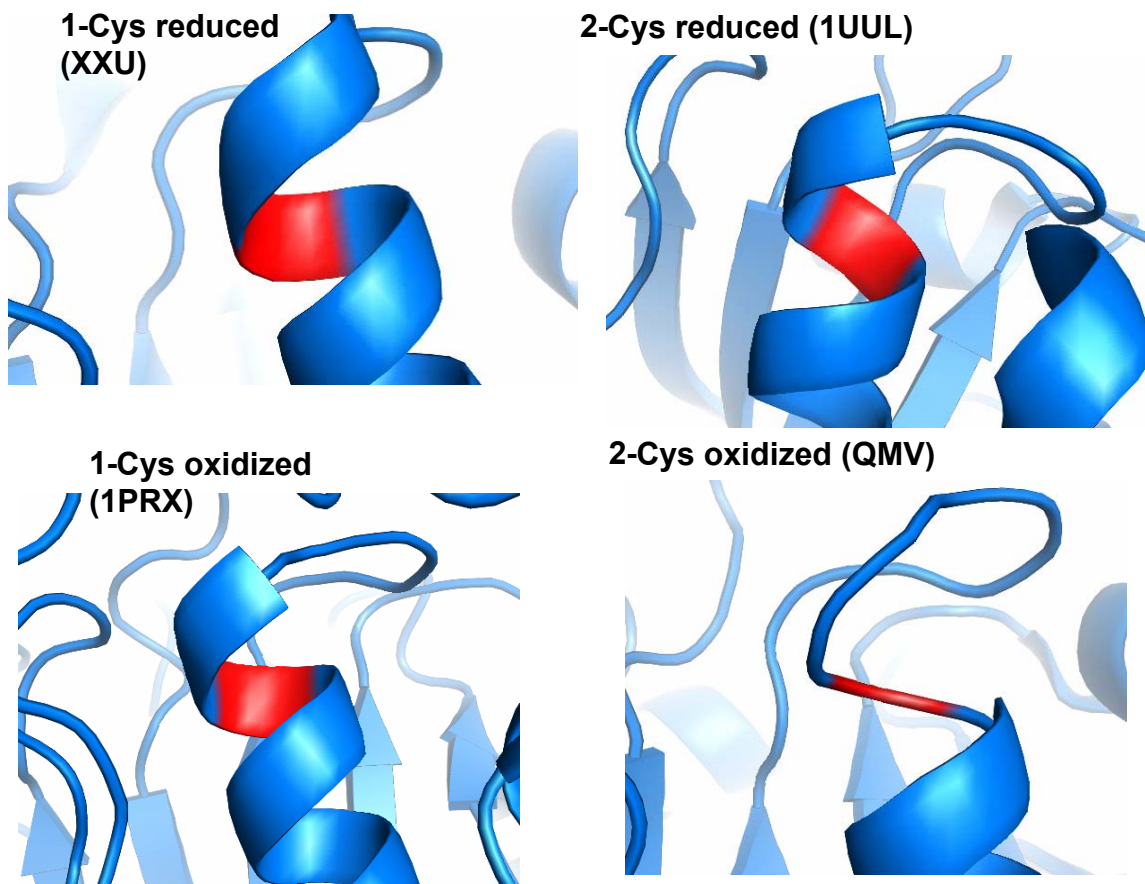

Figure 11

Supplement: pnas_0700481104_8.pdf [file pnas_0700481104_8.pdf]
